# Supplementary material for: Retrospective diagnosis of SARS-CoV-2 infection in patients with Long COVID by measuring specific T cell mediated IL-2 release.
Source: Research Square preprint supplement (doi:10.21203/rs.3.rs-989434/v1), 2021-10-21
Supplement: Supplementary file 1 [file 1d60d3c12e1f6d8efb303d83.pdf]

# Spike alignment

|            |      |      |                                                                                                                                                                                                                                                                                                                                                                                                                                                                                                                                                                                                                                                                                                                                                                                                                                                                                                                                                                                                                                                                                                                                                                                                                                                                                                                                                                                                                                                                                                                                                                                                                                                                |
|------------|------|------|----------------------------------------------------------------------------------------------------------------------------------------------------------------------------------------------------------------------------------------------------------------------------------------------------------------------------------------------------------------------------------------------------------------------------------------------------------------------------------------------------------------------------------------------------------------------------------------------------------------------------------------------------------------------------------------------------------------------------------------------------------------------------------------------------------------------------------------------------------------------------------------------------------------------------------------------------------------------------------------------------------------------------------------------------------------------------------------------------------------------------------------------------------------------------------------------------------------------------------------------------------------------------------------------------------------------------------------------------------------------------------------------------------------------------------------------------------------------------------------------------------------------------------------------------------------------------------------------------------------------------------------------------------------|
| SARS_CoV.2 | OC43 | HKU1 | <p>             -MFVFLVLLP-----LVSSQCVNLITRITQLPPAYNSFTGCVYYPDKVFRRSSVLHSTQDLFLP--F-SNVTVWEHAIHVSQTN--GTRKNDNPVDFNDGVYFASTEKSNIRIRGWIFGTTLDSDK<br/>             MFLLISLITAFVIGDLKCTSDNINDKDPPTPTDVTGNTGTYVLDVRYLNTLITFNGYVLLTSGSYRMAKSGVLLSRLEWKPPLFSDFIGAFKAKNTKVKIKDRVMYSEPAI<br/>             -MLLIIFLITTLAVIGDNTFALNDKNTVPRISEYVGVSYGLQTYILDRVYLTITLITGYFKAGANERDLSLKTGTYLSTLWYQKPFUSDENFGIFSRVNTKLVYVNTKLYLSESTI<br/>             TQSLILVNNAATNVILKVCFOFCNDPFLGVYHKNNKSMWSEFRVYSSANCTFEYVSQPFIMDLLEGQGNFKNLREFVFKNDIGYFKLYSKHTINLVRDLTPQGSALERLVDPLGINITRF<br/>             TIGSTFVNITSYVQPRNTNSTQDGN-KLQGLLEVSCQNMCEVRPTICKS-KGSRNKEWHLDTVSCVCKRNFYVDNADYLFHYHQEGGTFYAYTDGVVTKLFNVLGMALSHY<br/>             VIGSVFINNSYITVQVP-----HNGVLDTACQITMCEPHTICKS-KGSRNKEWHLDTVSCVCKRNFYVDNADYLFHYHQEGGTFYAYTDGVVTKLFNVLGMALSHY<br/>             QTLALHRSYVLTGSSSGWTAGAAAYVGVYQPRTEFLKYENGTTDAVGLADLPSETKCLTKSFVEKGVYQTSNERVQPTTESIVFPNNITLCPFEVFNATRFASVYAWNRKIRISNOVA<br/>             YVMP-----LTCN-----SKLTLEWVTPITSROYLLAFKQDGIIFNAVOMSDSEIKCTQSIAPPTGYELNGYVQVADYRKRPNLNCNTI EAWLNOKSVSPSLNWERKTFSCNF<br/>             YVLP-----LTCNAISSNTDNETLQVWVTLKSRQYLKFNENRGVITNAVDSSESFEIQLCTSKSLPNTQVYDLSGTVKVPATVPAHRIPLDQCDIOKWLNFVNVPSSLNWERKIFSCNF<br/>             DYSLVYNASFTFKCYGVSPTKLNDLCFFITNVYADSVIRGEVVRQVAPGQTKIADYVNYKLDPTDTGVIAMNNLDSKVG--GNVNYLHFRXSNL<br/>             NMSSIMSFQADSFICNNIDAAKIFCMCFSTIDKFAIPNGKVKQLQGLNLYLFQNFYRIDDITATSQLYVRLPAANVSRRFPSTWNKRFGTIEDSVFKPRAGVLTTHDNYVQAHCCKAP<br/>             NLSTILRLVATDSFNENFDESKIYSCFKSILDKFAIPNRSRDLQGLSSVFLQSSVYKIDITSSSKQLYSLPAINVITNNPSSWRRYGENN--FN-----LSSHSVVVSRVYCFSVN           </p> |
| SARS_CoV.2 | OC43 | HKU1 | <p>             QTLALHRSYVLTGSSSGWTAGAAAYVGVYQPRTEFLKYENGTTDAVGLADLPSETKCLTKSFVEKGVYQTSNERVQPTTESIVFPNNITLCPFEVFNATRFASVYAWNRKIRISNOVA<br/>             YVMP-----LTCN-----SKLTLEWVTPITSROYLLAFKQDGIIFNAVOMSDSEIKCTQSIAPPTGYELNGYVQVADYRKRPNLNCNTI EAWLNOKSVSPSLNWERKTFSCNF<br/>             YVLP-----LTCNAISSNTDNETLQVWVTLKSRQYLKFNENRGVITNAVDSSESFEIQLCTSKSLPNTQVYDLSGTVKVPATVPAHRIPLDQCDIOKWLNFVNVPSSLNWERKIFSCNF<br/>             DYSLVYNASFTFKCYGVSPTKLNDLCFFITNVYADSVIRGEVVRQVAPGQTKIADYVNYKLDPTDTGVIAMNNLDSKVG--GNVNYLHFRXSNL<br/>             NMSSIMSFQADSFICNNIDAAKIFCMCFSTIDKFAIPNGKVKQLQGLNLYLFQNFYRIDDITATSQLYVRLPAANVSRRFPSTWNKRFGTIEDSVFKPRAGVLTTHDNYVQAHCCKAP<br/>             NLSTILRLVATDSFNENFDESKIYSCFKSILDKFAIPNRSRDLQGLSSVFLQSSVYKIDITSSSKQLYSLPAINVITNNPSSWRRYGENN--FN-----LSSHSVVVSRVYCFSVN           </p>                                                                                                                                                                                                                                                                                                                                                                                                                                                                                                                                                                                                                                                                                                                                                                                                                               |
| SARS_CoV.2 | OC43 | HKU1 | <p>             DYSLVYNASFTFKCYGVSPTKLNDLCFFITNVYADSVIRGEVVRQVAPGQTKIADYVNYKLDPTDTGVIAMNNLDSKVG--GNVNYLHFRXSNL<br/>             NMSSIMSFQADSFICNNIDAAKIFCMCFSTIDKFAIPNGKVKQLQGLNLYLFQNFYRIDDITATSQLYVRLPAANVSRRFPSTWNKRFGTIEDSVFKPRAGVLTTHDNYVQAHCCKAP<br/>             NLSTILRLVATDSFNENFDESKIYSCFKSILDKFAIPNRSRDLQGLSSVFLQSSVYKIDITSSSKQLYSLPAINVITNNPSSWRRYGENN--FN-----LSSHSVVVSRVYCFSVN           </p>                                                                                                                                                                                                                                                                                                                                                                                                                                                                                                                                                                                                                                                                                                                                                                                                                                                                                                                                                                                                                                                                                                                                                                                                                                                    |
| SARS_CoV.2 | OC43 | HKU1 | <p>             DYSLVYNASFTFKCYGVSPTKLNDLCFFITNVYADSVIRGEVVRQVAPGQTKIADYVNYKLDPTDTGVIAMNNLDSKVG--GNVNYLHFRXSNL<br/>             NMSSIMSFQADSFICNNIDAAKIFCMCFSTIDKFAIPNGKVKQLQGLNLYLFQNFYRIDDITATSQLYVRLPAANVSRRFPSTWNKRFGTIEDSVFKPRAGVLTTHDNYVQAHCCKAP<br/>             NLSTILRLVATDSFNENFDESKIYSCFKSILDKFAIPNRSRDLQGLSSVFLQSSVYKIDITSSSKQLYSLPAINVITNNPSSWRRYGENN--FN-----LSSHSVVVSRVYCFSVN           </p>                                                                                                                                                                                                                                                                                                                                                                                                                                                                                                                                                                                                                                                                                                                                                                                                                                                                                                                                                                                                                                                                                                                                                                                                                                                    |
| SARS_CoV.2 | OC43 | HKU1 | <p>             DYSLVYNASFTFKCYGVSPTKLNDLCFFITNVYADSVIRGEVVRQVAPGQTKIADYVNYKLDPTDTGVIAMNNLDSKVG--GNVNYLHFRXSNL<br/>             NMSSIMSFQADSFICNNIDAAKIFCMCFSTIDKFAIPNGKVKQLQGLNLYLFQNFYRIDDITATSQLYVRLPAANVSRRFPSTWNKRFGTIEDSVFKPRAGVLTTHDNYVQAHCCKAP<br/>             NLSTILRLVATDSFNENFDESKIYSCFKSILDKFAIPNRSRDLQGLSSVFLQSSVYKIDITSSSKQLYSLPAINVITNNPSSWRRYGENN--FN-----LSSHSVVVSRVYCFSVN           </p>                                                                                                                                                                                                                                                                                                                                                                                                                                                                                                                                                                                                                                                                                                                                                                                                                                                                                                                                                                                                                                                                                                                                                                                                                                                    |
| SARS_CoV.2 | OC43 | HKU1 | <p>             DYSLVYNASFTFKCYGVSPTKLNDLCFFITNVYADSVIRGEVVRQVAPGQTKIADYVNYKLDPTDTGVIAMNNLDSKVG--GNVNYLHFRXSNL<br/>             NMSSIMSFQADSFICNNIDAAKIFCMCFSTIDKFAIPNGKVKQLQGLNLYLFQNFYRIDDITATSQLYVRLPAANVSRRFPSTWNKRFGTIEDSVFKPRAGVLTTHDNYVQAHCCKAP<br/>             NLSTILRLVATDSFNENFDESKIYSCFKSILDKFAIPNRSRDLQGLSSVFLQSSVYKIDITSSSKQLYSLPAINVITNNPSSWRRYGENN--FN-----LSSHSVVVSRVYCFSVN           </p>                                                                                                                                                                                                                                                                                                                                                                                                                                                                                                                                                                                                                                                                                                                                                                                                                                                                                                                                                                                                                                                                                                                                                                                                                                                    |
| SARS_CoV.2 | OC43 | HKU1 | <p>             DYSLVYNASFTFKCYGVSPTKLNDLCFFITNVYADSVIRGEVVRQVAPGQTKIADYVNYKLDPTDTGVIAMNNLDSKVG--GNVNYLHFRXSNL<br/>             NMSSIMSFQADSFICNNIDAAKIFCMCFSTIDKFAIPNGKVKQLQGLNLYLFQNFYRIDDITATSQLYVRLPAANVSRRFPSTWNKRFGTIEDSVFKPRAGVLTTHDNYVQAHCCKAP<br/>             NLSTILRLVATDSFNENFDESKIYSCFKSILDKFAIPNRSRDLQGLSSVFLQSSVYKIDITSSSKQLYSLPAINVITNNPSSWRRYGENN--FN-----LSSHSVVVSRVYCFSVN           </p>                                                                                                                                                                                                                                                                                                                                                                                                                                                                                                                                                                                                                                                                                                                                                                                                                                                                                                                                                                                                                                                                                                                                                                                                                                                    |
| SARS_CoV.2 | OC43 | HKU1 | <p>             DYSLVYNASFTFKCYGVSPTKLNDLCFFITNVYADSVIRGEVVRQVAPGQTKIADYVNYKLDPTDTGVIAMNNLDSKVG--GNVNYLHFRXSNL<br/>             NMSSIMSFQADSFICNNIDAAKIFCMCFSTIDKFAIPNGKVKQLQGLNLYLFQNFYRIDDITATSQLYVRLPAANVSRRFPSTWNKRFGTIEDSVFKPRAGVLTTHDNYVQAHCCKAP<br/>             NLSTILRLVATDSFNENFDESKIYSCFKSILDKFAIPNRSRDLQGLSSVFLQSSVYKIDITSSSKQLYSLPAINVITNNPSSWRRYGENN--FN-----LSSHSVVVSRVYCFSVN           </p>                                                                                                                                                                                                                                                                                                                                                                                                                                                                                                                                                                                                                                                                                                                                                                                                                                                                                                                                                                                                                                                                                                                                                                                                                                                    |
| SARS_CoV.2 | OC43 | HKU1 | <p>             DYSLVYNASFTFKCYGVSPTKLNDLCFFITNVYADSVIRGEVVRQVAPGQTKIADYVNYKLDPTDTGVIAMNNLDSKVG--GNVNYLHFRXSNL<br/>             NMSSIMSFQADSFICNNIDAAKIFCMCFSTIDKFAIPNGKVKQLQGLNLYLFQNFYRIDDITATSQLYVRLPAANVSRRFPSTWNKRFGTIEDSVFKPRAGVLTTHDNYVQAHCCKAP<br/>             NLSTILRLVATDSFNENFDESKIYSCFKSILDKFAIPNRSRDLQGLSSVFLQSSVYKIDITSSSKQLYSLPAINVITNNPSSWRRYGENN--FN-----LSSHSVVVSRVYCFSVN           </p>                                                                                                                                                                                                                                                                                                                                                                                                                                                                                                                                                                                                                                                                                                                                                                                                                                                                                                                                                                                                                                                                                                                                                                                                                                                    |
| SARS_CoV.2 | OC43 | HKU1 | <p>             DYSLVYNASFTFKCYGVSPTKLNDLCFFITNVYADSVIRGEVVRQVAPGQTKIADYVNYKLDPTDTGVIAMNNLDSKVG--GNVNYLHFRXSNL<br/>             NMSSIMSFQADSFICNNIDAAKIFCMCFSTIDKFAIPNGKVKQLQGLNLYLFQNFYRIDDITATSQLYVRLPAANVSRRFPSTWNKRFGTIEDSVFKPRAGVLTTHDNYVQAHCCKAP<br/>             NLSTILRLVATDSFNENFDESKIYSCFKSILDKFAIPNRSRDLQGLSSVFLQSSVYKIDITSSSKQLYSLPAINVITNNPSSWRRYGENN--FN-----LSSHSVVVSRVYCFSVN           </p>                                                                                                                                                                                                                                                                                                                                                                                                                                                                                                                                                                                                                                                                                                                                                                                                                                                                                                                                                                                                                                                                                                                                                                                                                                                    |
| SARS_CoV.2 | OC43 | HKU1 | <p>             DYSLVYNASFTFKCYGVSPTKLNDLCFFITNVYADSVIRGEVVRQVAPGQTKIADYVNYKLDPTDTGVIAMNNLDSKVG--GNVNYLHFRXSNL<br/>             NMSSIMSFQADSFICNNIDAAKIFCMCFSTIDKFAIPNGKVKQLQGLNLYLFQNFYRIDDITATSQLYVRLPAANVSRRFPSTWNKRFGTIEDSVFKPRAGVLTTHDNYVQAHCCKAP<br/>             NLSTILRLVATDSFNENFDESKIYSCFKSILDKFAIPNRSRDLQGLSSVFLQSSVYKIDITSSSKQLYSLPAINVITNNPSSWRRYGENN--FN-----LSSHSVVVSRVYCFSVN           </p>                                                                                                                                                                                                                                                                                                                                                                                                                                                                                                                                                                                                                                                                                                                                                                                                                                                                                                                                                                                                                                                                                                                                                                                                                                                    |
| SARS_CoV.2 | OC43 | HKU1 | <p>             DYSLVYNASFTFKCYGVSPTKLNDLCFFITNVYADSVIRGEVVRQVAPGQTKIADYVNYKLDPTDTGVIAMNNLDSKVG--GNVNYLHFRXSNL<br/>             NMSSIMSFQADSFICNNIDAAKIFCMCFSTIDKFAIPNGKVKQLQGLNLYLFQNFYRIDDITATSQLYVRLPAANVSRRFPSTWNKRFGTIEDSVFKPRAGVLTTHDNYVQAHCCKAP<br/>             NLSTILRLVATDSFNENFDESKIYSCFKSILDKFAIPNRSRDLQGLSSVFLQSSVYKIDITSSSKQLYSLPAINVITNNPSSWRRYGENN--FN-----LSSHSVVVSRVYCFSVN           </p>                                                                                                                                                                                                                                                                                                                                                                                                                                                                                                                                                                                                                                                                                                                                                                                                                                                                                                                                                                                                                                                                                                                                                                                                                                                    |
| SARS_CoV.2 | OC43 | HKU1 | <p>             DYSLVYNASFTFKCYGVSPTKLNDLCFFITNVYADSVIRGEVVRQVAPGQTKIADYVNYKLDPTDTGVIAMNNLDSKVG--GNVNYLHFRXSNL<br/>             NMSSIMSFQADSFICNNIDAAKIFCMCFSTIDKFAIPNGKVKQLQGLNLYLFQNFYRIDDITATSQLYVRLPAANVSRRFPSTWNKRFGTIEDSVFKPRAGVLTTHDNYVQAHCCKAP<br/>             NLSTILRLVATDSFNENFDESKIYSCFKSILDKFAIPNRSRDLQGLSSVFLQSSVYKIDITSSSKQLYSLPAINVITNNPSSWRRYGENN--FN-----LSSHSVVVSRVYCFSVN           </p>                                                                                                                                                                                                                                                                                                                                                                                                                                                                                                                                                                                                                                                                                                                                                                                                                                                                                                                                                                                                                                                                                                                                                                                                                                                    |
| SARS_CoV.2 | OC43 | HKU1 | <p>             DYSLVYNASFTFKCYGVSPTKLNDLCFFITNVYADSVIRGEVVRQV</p>                                                                                                                                                                                                                                                                                                                                                                                                                                                                                                                                                                                                                                                                                                                                                                                                                                                                                                                                                                                                                                                                                                                                                                                                                                                                                                                                                                                                                                                                                                                                                                                             |

## Membrane alignment

|            |                                                                                                                                 |
|------------|---------------------------------------------------------------------------------------------------------------------------------|
| SARS_CoV_2 | .....TVEELKKLLEQWNLVIGFLFLTLTWICLLLQQAIVANRNRFLVITIKLTFEWLWPVTTLACQVLAAYVRIHWITGGIAITAMACLVGMWLSYFIASFRFLFARTSMWSFNPETNILL      |
| OC43       | MSKTTAPAPVIVITADEAIAKFLKEWNFSLGIIILFTIILQFGYTSKSMFVAVIKMIILWLWMLPTIITLTFNCVYALNNVVLGSLISIVFTIVAHIMWIVFVNSIRLFIKRTGSAFWSFNPETNML |
| HKU1       | MNKSFFPQ----FTSQAVTFUKENWFLGVIIILFTIILQFGYTSKSMFVEIKMIILWLWMLPTIITLTFNCFYALNNAFLAFSIVFTIISIVWILYEVNSIRLFIKRTGSAFWSFNPETNML      |
| SARS_CoV_2 | .....                                                                                                                           |
| SARS_CoV_2 | NVPLHGTILTRALLESELVIGAVILRGHRIAGHHLEGR-CDIKDLPKETIVATSRITLSYKLGASQRVAGDSGFAASRYRIRGNKLNTHDSSSSSDNIALLVQ--                       |
| OC43       | CIDMKGTMYVRRIIEDYHTLTVTIIRGHVYIQGIKLGTYGWADLPAMTMVAKVTHLCITYKRGFLDRIISDTSGFAVYKSKVGYRLLPSTQKSGMDTALLRNNI                        |
| HKU1       | CIDMKGKMFVRVRIEDYHTLTATVIRGHVYIQGVKLGTYTILSLDLPVAVTVAKVQVLCITYKRAFLDKLDVNSGFAFVYKSKVGYRLLPSS-KPSGMDTALLRA--                     |

## Nucleocapsid alignment

|            |                                                                                                                            |
|------------|----------------------------------------------------------------------------------------------------------------------------|
| OC43       | MSFTPKSSSRASSGNSGNIGLK--WADQSQFRNQTRGRAQPKQTATSQPSGQNVVPHYSWFSGITQFKGKELEFAEGGVPIAPGVPTAEKGYWYRNRSRFATDGQRQLLPR            |
| HKU1       | MSYTPGHVAGSRSSGNSG--ILKKTSWADQSERNYQTFNRGRKTPKPTVSTDPQ--ENTIPHYSWFSGITQFKGGRDKFSDQGVPIAFGIPSEAKGYWYRNRSRSEKATDGQKQLLPR     |
| SARS_CoV_2 | -MSDNGPQNRNPRITFGP-----DSTGSGNQNGERSKQRRPQGLPNN-----TASWFTALTQHCQ-EDLKFPREGQVPIINTSSDDQIGYRRATRR-IRGGDGKMKDLSPR            |
| OC43       | WYFYVLGTGPHAKDQYGTDINGVYHVASNQADVNPADIVDRDSSDEATPTRFPPGTVLPQGYVEGSGRSAPIRSRTPT-SRASSACSRRSANGNPTSGVTPDMADQIASLVLAELG       |
| HKU1       | WYFYVLGTGPYANASYGESLEGVFWANHQADTSPSDVSSRDPITTEQAIPTRFPGTILLPGYVEGS-GRSASMSRPPGRS-QRSGPNKSLSRNSNFHSDSIVKPDMADEIANLVLAELG    |
| SARS_CoV_2 | WYFYVLGTGPEAGLPYGANKDGIIVVATEGALNTPKDHITGTRNANNAAIVLQLMQGTTLPKGFVAEGSRGSGASRSRSRNSRSTPGSSRTSPAMAGNGGDAIALLLDLRLNQLES       |
| OC43       | KDATKPPQVTKHFAKEVQKILNK-PRQXRSNNKQCTVQQCFGKRGPNQ--NFGGEMLKLGTSDPQFPILAEAPTAGAFFFGSKLELAKVQNLGSGNPDEPKQDVYELRYNGAIRFDSTLSGF |
| HKU1       | KDS-KPQQVTKQMAKEIKHILTK-PRXRTPNMHCNVQQCFGKRGPSQ--NFGNAEMLKLGTDNPQFPILAEAPTGPAGFFGSKLELVRE---SEADSPVKDVFELRYNGSIRFDSTLPGF   |
| SARS_CoV_2 | KMSGKQQQQQQGVTKKSAAEASKPRQKRTATAYNVITQAFGRGPEQTQGNFQDQELIRQGTDYKHWPPQIAQFAPSASAFFGMRIGMEVTP-----SGTWLTTCAIKLDDKDNF         |
| OC43       | ETIMKVLSENINAYQ--QQGMMNMSPKPQRGRGHKGGQGENDNISVAVPKSRVQQNKSIELTAEDI SLKKMDEPFTEDTSEI                                        |
| HKU1       | ETIMKVLKENLDAYNSNQNTVSGLSLPKQKRKGKQSPPELFDLSNLSADT---QHISNFTPEDHSLLATLDDPYVEDSVA-                                          |
| SARS_CoV_2 | KDQVILLNKHIDAYKTFPTTEPKDKKKKADETALPQKQKQTVTLLPAA-----DLDDFSQQLQQSMSSADSTQA---                                              |

**Figure S1: Alignment of peptide sequences from spike, nucleocapsid and membrane proteins shows areas of overlap for each protein.** Alignments performed using clustal omega and visualised by UGENE.

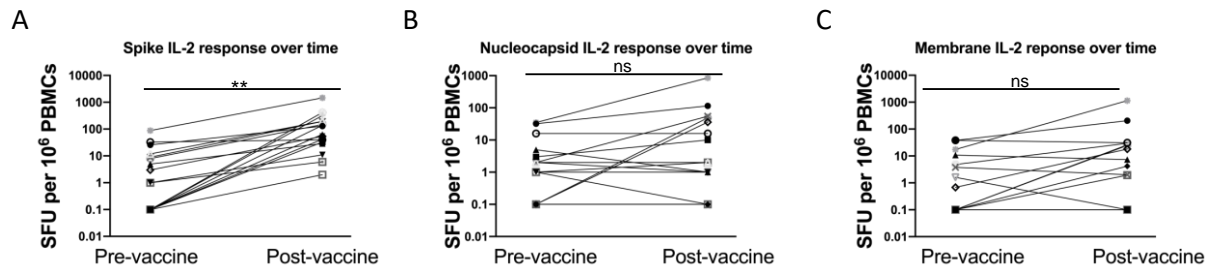

**Figure S2: Vaccination increases IL-2 responses to Spike but not nucleocapsid or membrane peptides.** PBMCs were isolated from 17 donors with diagnosed long COVID pre- and post-vaccination. These PBMCs were stimulated with spike, nucleocapsid or membrane peptides and IL-2 responses were measured by fluorospot assay as spot forming units per million PBMCs. Each condition was run in duplicate and an unstimulated control was subtracted to remove background cytokine production.  $P < 0.01$  and ns = not significant by Wilcoxon Signed-Rank Test.

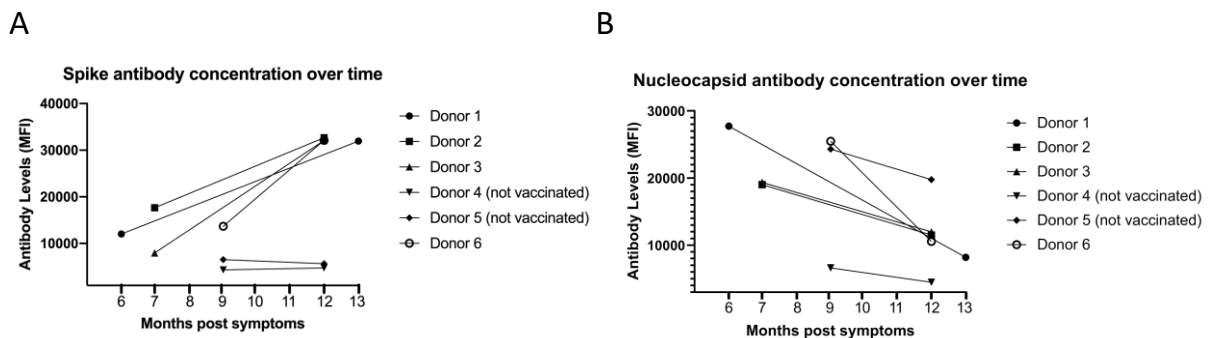

**Figure S3: Spike antibodies are confounded by vaccination while nucleocapsid antibodies wane quickly.** Antibody levels were quantified from 6 donors before and after vaccination using multiplex particle-based flow cytometry for A) spike (not significant by Wilcoxon Signed-Rank) or B) nucleocapsid antibodies ( $p < 0.05$  by Wilcoxon Signed-Rank).
